# Supplementary material for: Cu/Fe embedded N-doped carbon as a highly durable oxygen reduction electrocatalyst
Source: Royal Society of Chemistry journal article supplement (doi:10.1039/d3ma00540b), 2023-01-01
Supplement: d3ma00540b1.pdf [file d3ma00540b1.pdf]

## Supplimentary Information

### Cu/Fe embedded N-doped carbon as highly durable oxygen reduction electrocatalyst

*Banafsha Habib<sup>a, b</sup>, Shaowei Chen<sup>b</sup>, Forrest Nichols<sup>b</sup>, Shamraiz Talib<sup>c</sup>, Nasima Arshad<sup>d</sup>, Anham Zafar<sup>a</sup>, Arshad Mahmood<sup>e</sup>, Shahid Zaman<sup>\*f</sup>, Naveed Janjua<sup>\*a</sup>*

<sup>a</sup>Department of Chemistry Quaid-i-Azam University, Islamabad, 45320, Pakistan

<sup>b</sup>Department of Chemistry and Biochemistry, University of California, 1156 High Street, Santa Cruz, California 95064, USA

<sup>c</sup>Department of Chemistry and Key Laboratory of Organic Optoelectronics & Molecular Engineering of Ministry of Education, Tsinghua University, Beijing 100084, China

<sup>d</sup>Department of Chemistry, Allama Iqbal Open University Islamabad Pakistan

<sup>e</sup>Material Science and Engineering Division, National Institute of Laser and Optronics/PIEAS, Islamabad, 45650, Pakistan

<sup>f</sup>Institut d'Innovations en Écomatériaux, Écoproduits et Écoénergies, Université du Québec à Trois-Rivières, 3351 boul. des forges, Trois-Rivières, Québec G8Z 4M3, Canada

Correspondence: [shahid.zaman@uqtr.ca](mailto:shahid.zaman@uqtr.ca) (S. Zaman), [nkjanjua@qau.edu.pk](mailto:nkjanjua@qau.edu.pk) (N. K. Janjua)

## **Materials and methods**

### **Chemicals**

All the chemicals, Pt/C (20wt %), copper (II) chloride dihydrate ( $\text{CuCl}_2 \cdot 2\text{H}_2\text{O}$ ), zinc nitrate hexahydrate ( $\text{ZnNO}_3 \cdot 6\text{H}_2\text{O}$ ), potassium hydroxide (KOH), 2-methylimidazole ( $\text{CH}_3\text{C}_3\text{H}_2\text{N}_2\text{H}$ ), ferric chloride anhydrous ( $\text{FeCl}_3$ ), tannic acid ( $\text{C}_{76}\text{H}_{52}\text{O}_{46}$ ), potassium thiocyanate (KSCN) and  $\text{H}_2\text{O}$  ( $18.3 \text{ M}\Omega \cdot \text{cm}$ ) were purchased from certified ACS fisher chemicals and were used as received without further purification.

### **Preparation of ZIF-8**

For the synthesis of ZIF-8,  $\text{ZnNO}_3 \cdot 6\text{H}_2\text{O}$  (1.116 g), 30 mL of methanol was dissolved in one flask (solution 1), and in another flask, 2-methylimidazole (1.232 g) was dissolved in 30 mL of methanol (solution 2). Mix both solutions under sonication for 10 min until the solution mixture turns from transparent to milky white. Transfer this solution into a Teflon-lined stainless-steel autoclave (100 mL) at  $120^\circ\text{C}$  for 3.5 h. Then collected the milky white precipitates with methanol by centrifugation for 10 min at 6000 rpm, and dried in the vacuum oven for 24 h at  $50^\circ\text{C}$ . These dried precipitates were called ZIF-8 crystals.

### **Preparation of hollow ZIF-8**

To prepare hollow ZIF-8, 80 mg of ZIF-8 crystals were taken and dispersed in deionized  $\text{H}_2\text{O}$  (3 mL) and sonicated for 20 min. Tannic acid solution ( $5 \text{ mg mL}^{-1}$  in water) was added under constant stirring until the solution changed color from milky white to orange. Finally, the solution was washed with deionized water and dried completely under the vacuum for 24 h at  $50^\circ\text{C}$ .

### **Preparation of HNC**

To synthesize HNC, the pyrolysis of hollow ZIF-8 was done and moved into the ceramic boats. These ceramic boats were placed in the middle of the tube furnace. The tube furnace was heated at  $900^\circ\text{C}$  with an increasing and decreasing rate of  $5^\circ\text{C min}^{-1}$  under the vacuum for 3 h. The obtained product was cooled to room temperature.

### **Preparation of Cu/Fe(x:y)-HNC**

The HNC (20 mg) was dispersed in methanol (30 mL) and varying ratios of  $\text{CuCl}_2 \cdot 2\text{H}_2\text{O}$  and anhydrous  $\text{FeCl}_3$  *i.e.*, Cu/Fe (1:1), (2:1), (3:1), were added and sonicated for 30 min. These solutions were heated to reflux in an oil bath for 12 h. The synthesized precipitates were separated

and dried in vacuum for 24 h. The final products were sintered at 900 °C with an increasing rate of 5 °C and decreasing rate of 10 °C for 3 h. These final samples were labelled as Cu-HNC, Fe-HNC, and Cu/Fe (1:1)-HNC, Cu/Fe (2:1)-HNC, and Cu/Fe (3:1)-HNC, respectively. <sup>40</sup>

### **Electrode modification**

A CHI-710 electrochemical workstation was used to evaluate the ORR activity of samples by means of a standard three-electrode cell, and Ag/AgCl (1M KCl), graphite rod and rotating gold ring disk electrode (RRDE) were used as reference, counter and working electrodes, respectively. The area for RRDE was estimated to be 0.246 cm<sup>2</sup>. The reference electrode was calibrated against a reversible hydrogen electrode (RHE) and the ring potential was set at +1.5 V vs. RHE for ORR test. 2 mg of each sample were sonicated into 1 mL of isopropanol for 15 min to prepare the catalyst inks and 100 wt % of Nafion solution (10 μL) was subsequently added and sonicated for 25 min to form a homogeneous ink. 20 μL of the ink were drop-casted onto the glassy carbon disk electrode which was dried at room temperature. Finally, 5 μL of a 20 wt% Nafion solution were drop casted onto it. The loaded amount of the catalyst was 0.162 mg cm<sup>-2</sup>.

### **DFT calculations**

Code of Vienna Ab-initio Simulation Package (VASP) was used to determine DFT calculations. At the same time, generalized gradient approximation (GGA) of Perdew-Burke-Ernzerhof (PBE) was employed to determine exchange- correlation term. Projector-augmented wave, pseudopotentials were used to model the interactions between outer and core electrons. [35] The cutoff energy for the plane-wave expansion was set to 450 eV. For geometry optimization total energy and residual forces to be employed are 2 eV/Å<sup>-1</sup> and 0.02 eV/Å<sup>-1</sup>, respectively. To avoid the interlayer interactions, a model consisting of 2×2×1 supercell has been optimized in a periodically repeated slab with a vacuum layer of 20 Å. The reciprocal space was sampled by the gamma points in the Brillouin zones with a grid of 3×3×1. Gibbs free energy change (ΔG) was computed for each elemental step via a standard hydrogen electrode (SHE).

The number of electrons involved in the oxygen reduction process on Cu/Fe (2:1)-HNC interface using Figure 4, was calculated to be closer to 4, suggesting that ORR on Cu/Fe (2:1)-HNC platforms predominantly follows 4-electron reduction pathways as detailed in the following steps:

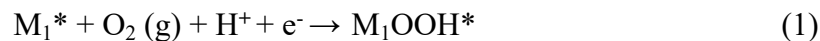

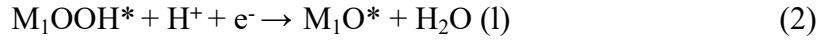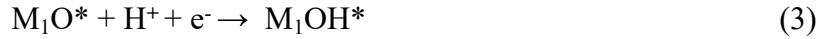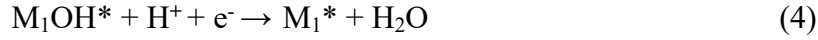

The difference of Gibbs free energies ( $\Delta G_{OOH^*}$ ,  $\Delta G_{O^*}$ ,  $\Delta G_{OH^*}$ ) involving electron transfers for all the elementary steps were calculated by using the following equation:

$$\Delta G = \Delta E + \Delta ZPE - T\Delta S + \Delta G_U + \Delta G_{pH} \quad (5)$$

where  $\Delta E$  corresponds to the energy difference among the free-standing and adsorption states of reaction intermediates,  $\Delta ZPE$  is the change in zero-point energies,  $\Delta S$  is the entropy change, and  $T$  is the temperature ( $T=298.15$  K), respectively. DFT calculations were attained from the vibrational frequency which intern directly provided the adsorption energies of  $\Delta E$ .  $\Delta G_U = -eU$ , where “e” and “U” are the number of electrons transferred and “U” denotes the optimal potential established on the SHE.  $\Delta G_{pH}$  directs the Gibbs free energy correction of the pH, which can be calculated by:  $\Delta G_{pH} = -k_B T \ln 10^* pH$ , where  $k_B$  is the Boltzmann constant ( $1.380649 \times 10^{-23}$  JK<sup>-1</sup>) and  $T$  indicates 298.15 K. The vibrational frequencies and entropies of the molecules in gas phase were taken from the NIST database. The  $\Delta G$  of four elementary steps for ORR processes can be defined as:  $\Delta G_1 = \Delta G_{OOH^*} - 4.92$  eV,  $\Delta G_2 = \Delta G_{O^*} - \Delta G_{OOH^*}$ ,  $\Delta G_3 = \Delta G_{OH^*} - \Delta G_{O^*}$ ,  $\Delta G_4 = \Delta G_{OH^*}$ . The overpotential ( $\eta$ ) is a primary parameter used to further justify the catalytic activity of ORR, ( $\eta^{ORR}$ ) was calculated by using the following equation, <sup>41</sup>

$$\eta^{ORR} (V) = \max [\Delta G_1, \Delta G_2, \Delta G_3, \Delta G_4] / e + 1.23 \quad (6)$$

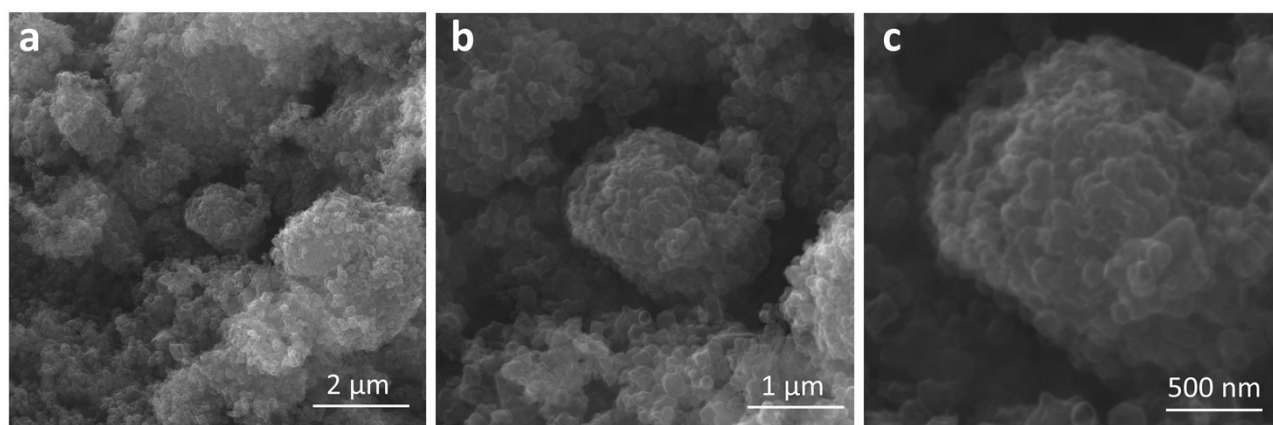

**Figure S1.** SEM images of Cu/Fe (1:1)-HNC.

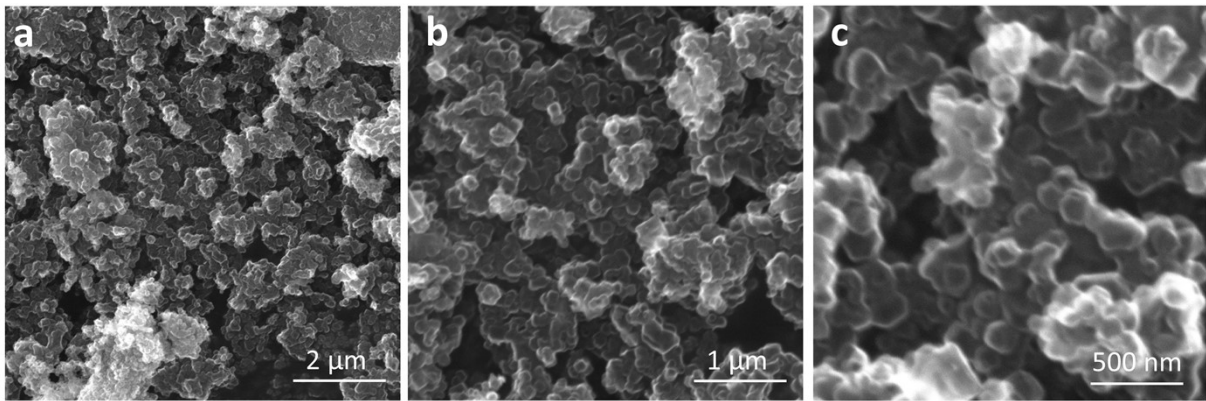

**Figure S2.** SEM images of Cu/Fe (3:1)-HNC.

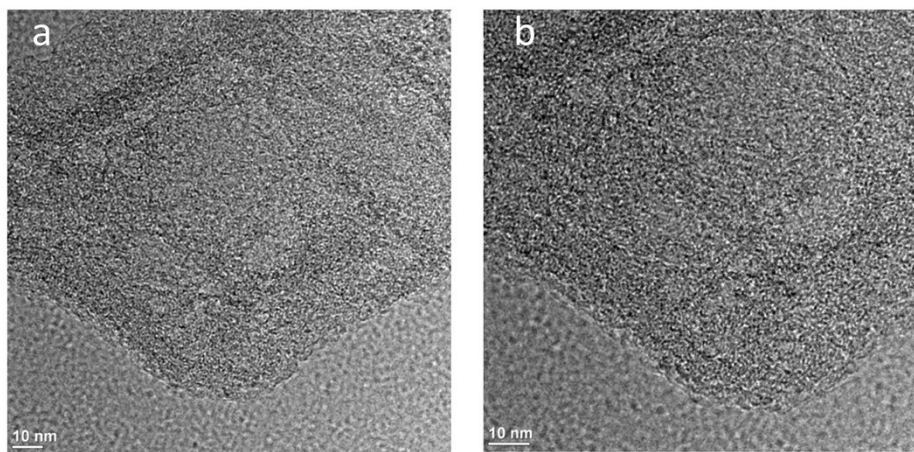

**Figure S3.** TEM images of Cu/Fe (2:1)-HNC at 10 nm.

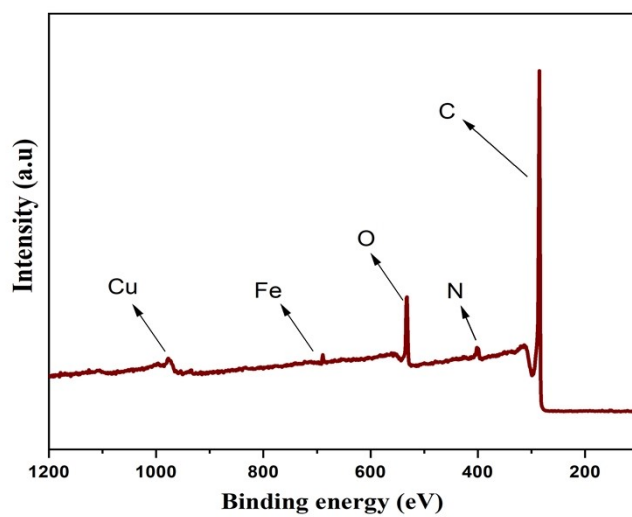

**Figure S4.** survey spectra demonstrate the presence of Cu at 934, Fe at 710 and N at 400 and O at 531, and C at 285 eV respectively in the Cu/Fe (2:1)-HNC.



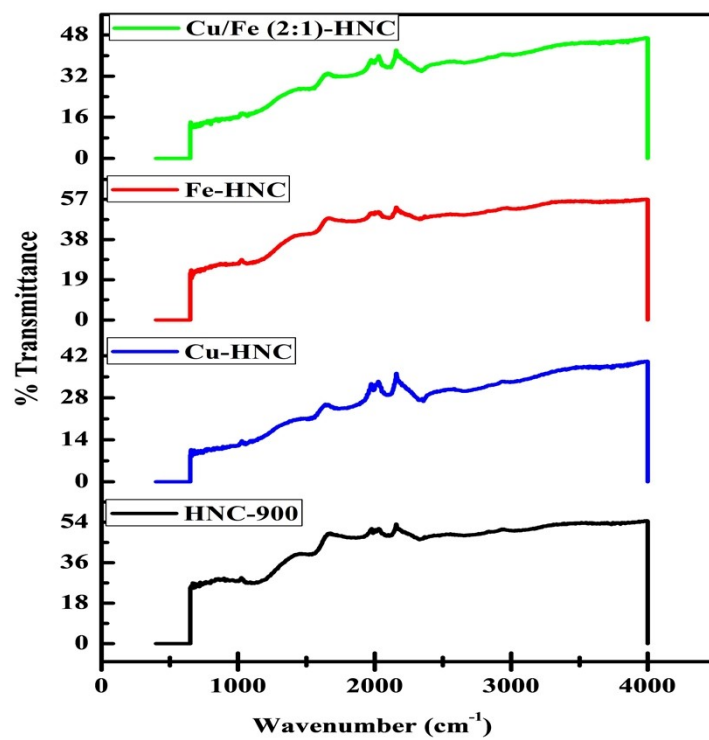

**Figure S5.** FTIR spectra for HNC, Cu-HNC, Fe-HNC, and Cu/Fe (2:1)-HNC

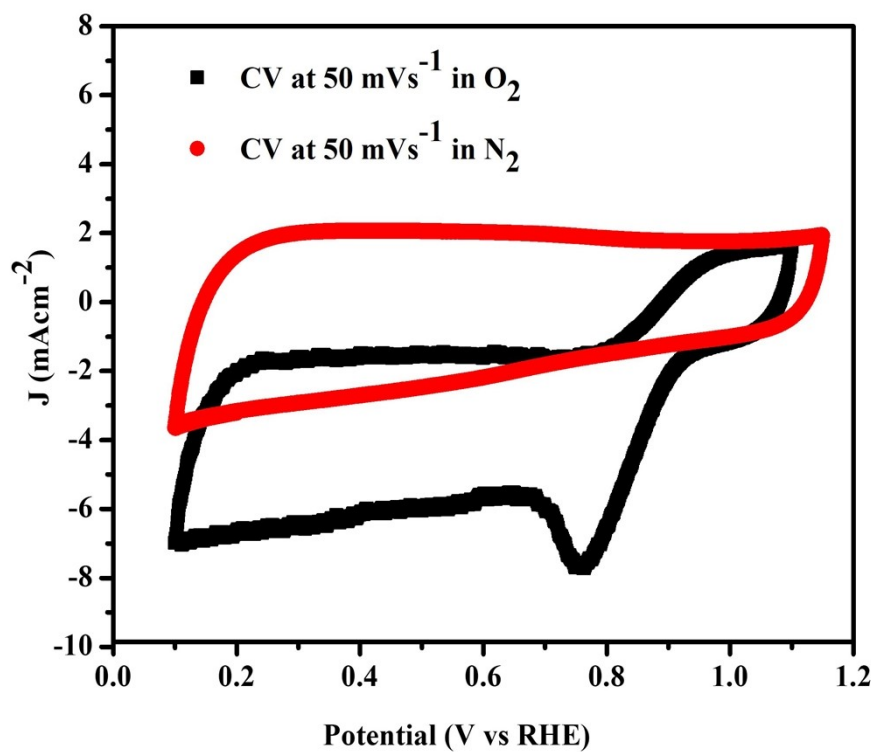

**Figure S6.** Cyclic Voltammetry profile of the best catalyst Cu/Fe (2:1)-HNC in  $\text{N}_2$  and  $\text{O}_2$  saturated 0.1 M KOH solution.

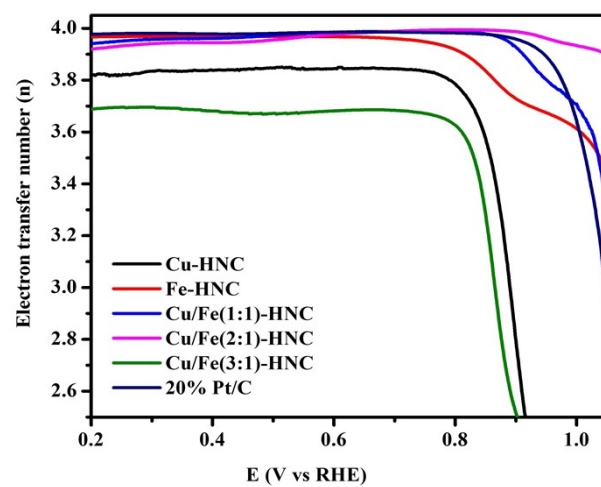

**Figure S7.** Variation of the electron transfer number (n) with electrode potential for all the catalysts along with benchmark 20% Pt/C.

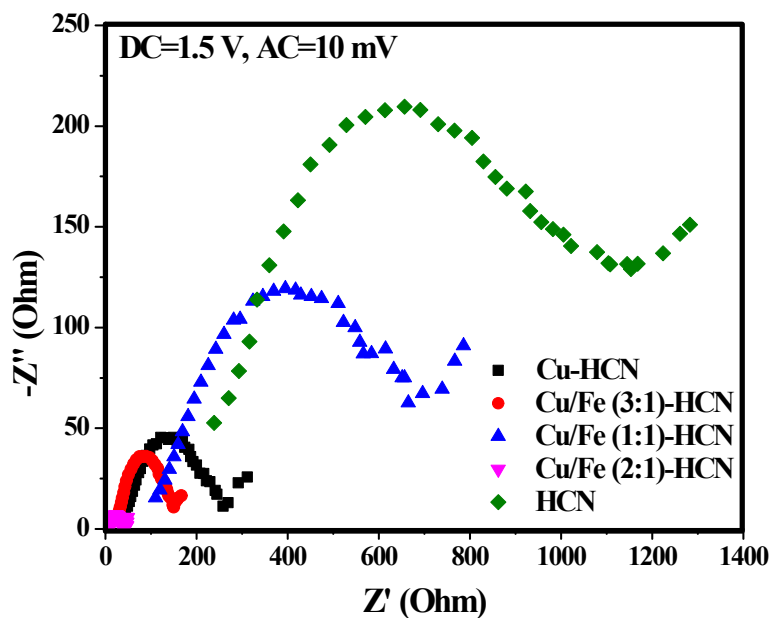

**Figure S8.** EIS performance of HNC, Cu-HNC, Fe-HNC, Cu/Fe(1:1)-HNC, Cu/Fe(2:1)-HNC and Cu/Fe(3:1)-HNC in 1M KOH.

**Table S1.** Summary of  $E_{\text{onset}}$  and  $E_{1/2}$  of all the catalysts with Tafel slope values and “n” number

| <b>Catalysts</b>      | <b><math>E_{\text{On}}</math> (V vs. RHE)</b> | <b><math>E_{1/2}</math> (V vs. RHE)</b> | <b>n at +0.7 V</b> | <b>Tafel slope (mV/dec)</b> |
|-----------------------|-----------------------------------------------|-----------------------------------------|--------------------|-----------------------------|
| <b>HNC-900</b>        | <b>0.855</b>                                  | <b>0.69</b>                             | <b>3.50</b>        | <b>177</b>                  |
| <b>Cu-HNC</b>         | <b>0.96</b>                                   | <b>0.82</b>                             | <b>3.84</b>        | <b>111</b>                  |
| <b>Fe-HNC</b>         | <b>0.90</b>                                   | <b>0.73</b>                             | <b>3.93</b>        | <b>115</b>                  |
| <b>Cu/Fe(1:1)-HNC</b> | <b>0.95</b>                                   | <b>0.78</b>                             | <b>3.98</b>        | <b>110</b>                  |
| <b>Cu/Fe(2:1)-HNC</b> | <b>1.01</b>                                   | <b>0.84</b>                             | <b>3.98</b>        | <b>104</b>                  |
| <b>Cu/Fe(3:1)-HNC</b> | <b>0.90</b>                                   | <b>0.76</b>                             | <b>3.68</b>        | <b>96</b>                   |
| <b>20% Pt/C</b>       | <b>1.00</b>                                   | <b>0.82</b>                             | <b>3.98</b>        | <b>115</b>                  |

**Table S2.** Summary of the kinetic current density of different catalysts at 0.8 V, 0.85 V,

and 0.9 V

| <b>Catalysts</b>      | <b>J<sub>k</sub> at +0.8 V<br/>(mAcm<sup>-2</sup>)</b> | <b>J<sub>k</sub> at +0.85 V<br/>(mAcm<sup>-2</sup>)</b> | <b>J<sub>k</sub> at +0.9 V<br/>(mAcm<sup>-2</sup>)</b> |
|-----------------------|--------------------------------------------------------|---------------------------------------------------------|--------------------------------------------------------|
| <b>HNC-900</b>        | -0.25                                                  | -1.158                                                  | -0.130                                                 |
| <b>Cu-HNC</b>         | -3.704                                                 | -1.678                                                  | -0.455                                                 |
| <b>Fe-HNC</b>         | -1.029                                                 | -0.456                                                  | -0.255                                                 |
| <b>Cu/Fe(1:1)-HNC</b> | -1.803                                                 | -0.721                                                  | -0.174                                                 |
| <b>Cu/Fe(2:1)-HNC</b> | -4.674                                                 | -2.859                                                  | -1.174                                                 |
| <b>Cu/Fe(3:1)-HNC</b> | -1.298                                                 | -0.273                                                  | -0.077                                                 |
| <b>20% Pt/C</b>       | -3.891                                                 | -2.243                                                  | -1.019                                                 |

**Table S3:** Comparison of ORR active catalysts and activity parameters

| <b>Catalysts</b>                           | <b>E<sub>on</sub></b><br><b>(V vs. RHE)</b> | <b>E<sub>1/2</sub></b><br><b>(V vs. RHE)</b> | <b>n</b> | <b>Electrolyte</b> | <b>References</b>                                |
|--------------------------------------------|---------------------------------------------|----------------------------------------------|----------|--------------------|--------------------------------------------------|
| <b>Cu-HNC 900</b>                          | 0.96                                        | 0.81                                         | 3.97     | 0.1 M KOH          | (This work)                                      |
| <b>Cu/Fe(2:1)-HNC</b>                      | 1.01                                        | 0.84                                         | 3.98     | 0.1 M KOH          | (This work)                                      |
| <b>Ir-HNC 900</b>                          | 1.00                                        | 0.83                                         | 3.93     | 0.1 M KOH          | (This work)                                      |
| <b>Cu-SAs/N-C</b>                          | 0.95                                        | 0.81                                         | 3.80     | 0.1 M KOH          | Nat. Catal. 2018,<br>1, 781-786.                 |
| <b>Co-ISAS/p-CN</b>                        | 0.97                                        | 0.83                                         | 3.87     | 0.1 M KOH          | Adv. Mater. 2021,<br>1706508.                    |
| <b>Co@Co<sub>3</sub>O<sub>4</sub>/NC-1</b> | 0.94                                        | 0.80                                         | 3.76     | 0.1 M KOH          | Angew. Chem. Int.<br>Ed. 2019, 55,<br>4087-4091. |
| <b>Fe-N-SCCFs</b>                          | 1.00                                        | 0.88                                         | 3.98     | 0.1 M KOH          | Nano Lett. 2017,<br>17, 2020-2021.               |
| <b>S,N-Fe/N/CCNT</b>                       | 0.95                                        | 0.82                                         | 3.86     | 0.1 M KOH          | Angew. Chem. Int.<br>Ed. 2017, 56, 610.          |
| <b>D-AC@2Mn-4Co</b>                        | 0.92                                        | 0.79                                         | 3.80     | 0.1 M KOH          | Adv. Mater. 2020,<br>28, 8771.                   |

**Table S4.** Summary of electrochemical parameters retrieved from EIS and CV for all the catalysts in 1 M KOH

| <b>Sample Code</b>   | <b>Diffusion Coefficient <math>D^{\circ} / \times 10^{-9}</math> (<math>\text{cm}^2.\text{s}^{-1}</math>)</b> | <b>Mass Transport Coefficient, <math>m_T / \times 10^{-4}</math> (<math>\text{cm}.\text{s}^{-1}</math>)</b> | <b><math>\alpha</math></b> | <b><math>E_{\text{On}}</math> (10 <math>\text{mAcm}^{-2}</math>) vs. RHE</b> | <b>Overpotential (V) at 10 <math>\text{mA}.\text{cm}^{-2}</math></b> |
|----------------------|---------------------------------------------------------------------------------------------------------------|-------------------------------------------------------------------------------------------------------------|----------------------------|------------------------------------------------------------------------------|----------------------------------------------------------------------|
| <b>Cu-HCN</b>        | 3.624                                                                                                         | 1.118                                                                                                       | 0.563                      | 2.240                                                                        | 1.011                                                                |
| <b>CuFe(1,1)-HCN</b> | 4.131                                                                                                         | 1.268                                                                                                       | 0.547                      | 2.246                                                                        | 1.016                                                                |
| <b>CuFe(2,1)-HCN</b> | 4.933                                                                                                         | 1.386                                                                                                       | 0.501                      | 2.252                                                                        | 1.022                                                                |
| <b>CuFe(3,1)-HCN</b> | 4.266                                                                                                         | 1.289                                                                                                       | 0.796                      | 2.070                                                                        | 0.841                                                                |
